# Supplementary material
Source: Springer Nature journal article supplement (https://www.springermedizin.de/resource/supplementary/13052_2013_321_MOESM1_ESM.pdf/9671858)
Supplement: MOESM1 [file 9671858]

**Immunomodulation**

**Regulation of circadian rhythms**

**Regulation of mitochondrial functions**

**Measurement of day length**

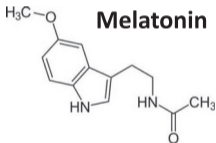

**Anti-inflammatory properties**

**Sleep initiation**

**Antioxidant actions**

**Vasomotor control**

**Anti-excitatory actions**
